# Supplementary material for: Na2Cd7B8O20: a new noncentrosymmetric compound with special [B3O7] units
Source: Royal Society of Chemistry journal article supplement (doi:10.1039/c3ce26587k), 2013-01-01
Supplement: c3ce26587k.pdf [file c3ce26587k.pdf]

## Supporting Information

# **Na<sub>2</sub>Cd<sub>7</sub>B<sub>8</sub>O<sub>20</sub>: A New Noncentrosymmetric Compound with Special [B<sub>3</sub>O<sub>7</sub>] Units**

**Lin Zhou<sup>a, b</sup>, Shilie Pan<sup>a\*</sup>, Xiaoyu Dong<sup>a, b</sup>, Hongwei Yu<sup>a, b</sup>, Hongping Wu<sup>a</sup>, Fangfang Zhang<sup>a</sup>, Zhongxiang,  
Zhou<sup>a</sup>**

*<sup>a</sup>Xinjiang Key Laboratory of Electronic Information Materials and Devices, Xinjiang Technical Institute  
of Physics & Chemistry, Chinese Academy of Sciences, 40–1 South Beijing Road, Urumqi 830011,  
China; <sup>b</sup>University of the Chinese Academy of Sciences, Beijing 100049, China*

\*To whom correspondence should be addressed. E-mail: slpan@ms.xjb.ac.cn (S. Pan). Phone: (86)-991-  
3674558. Fax: (86)-991-3838957.

**Figure S1.** The XRD patterns for  $\text{Na}_2\text{Cd}_7\text{B}_8\text{O}_{20}$ . The black curve is the calculated one, the red curve is the pattern of the stoichiometric powder mixtures, the blue curve is the pattern of powder mixture with excessive Na and the green curve is the pattern of powder mixture with excessive Cd.

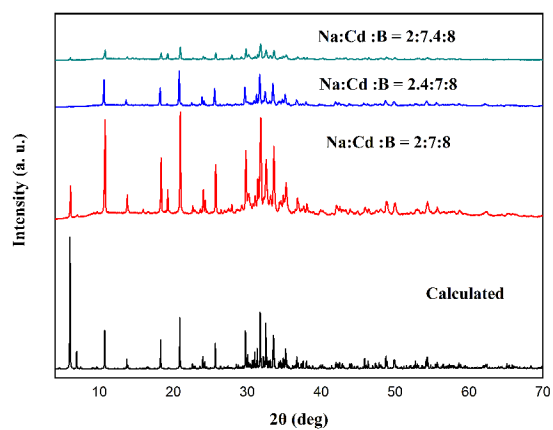

**Figure S2.** The structure of the two-dimensional layer composed of  $\text{CdO}_n$  ( $n = 6, 7$ ) polyhedra shown in blue and  $\text{Na/CdO}_n$  ( $n = 5, 6$ ) polyhedra in green extending in the (010) plane.

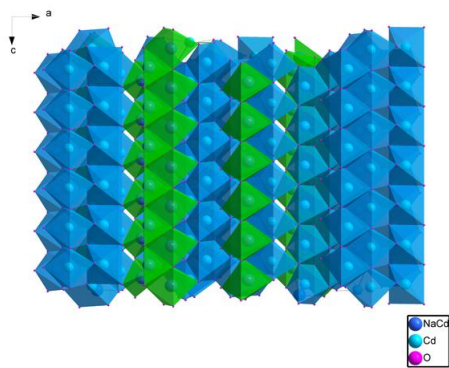

**Figure S3.** The structure of  $[B_3O_7]$  unit.

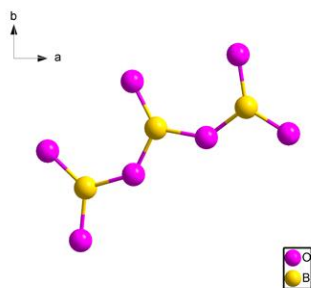

**Figure S4.** The IR spectrum of  $\text{Na}_2\text{Cd}_7\text{B}_8\text{O}_{20}$ .

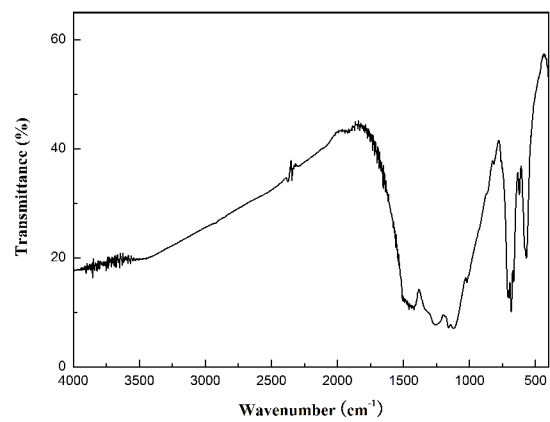

**Figure S5.** SHG measurements of  $\text{Na}_2\text{Cd}_7\text{B}_8\text{O}_{20}$ .

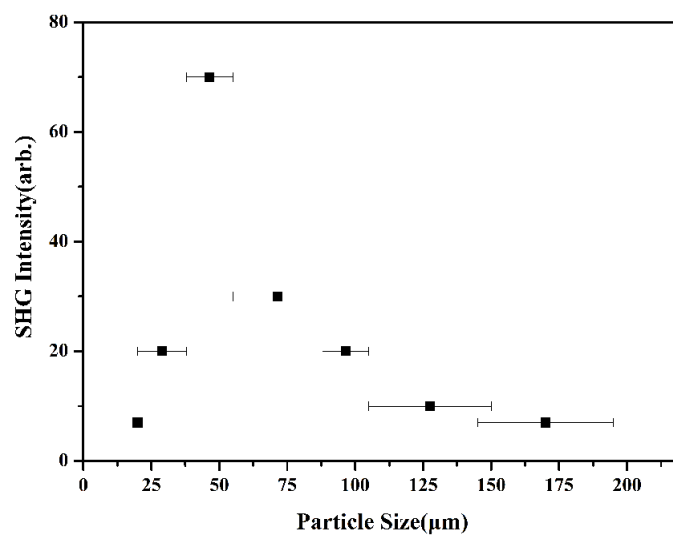

**Table S1.** Atomic coordinates ( $\times 10^4$ ) and equivalent isotropic displacement parameters ( $\text{\AA}^2 \times 10^3$ ) for  $\text{Na}_2\text{Cd}_7\text{B}_8\text{O}_{20}$ .  $U_{\text{eq}}$  is defined as one-third of the trace of the orthogonalized  $U_{ij}$  tensor.

| Atom        | $x/a$   | $y/b$   | $z/c$     | $U_{\text{eq}}$ | occ         |
|-------------|---------|---------|-----------|-----------------|-------------|
| Na(1)/Cd(1) | 1995(1) | 1433(1) | -3227(1)  | 13(1)           | 0.276/0.724 |
| Na(2)/Cd(2) | 1509(1) | 1788(1) | -1220(2)  | 7(1)            | 0.456/0.544 |
| Na(3)/Cd(3) | 2734(1) | 247(1)  | 9857(4)   | 7(1)            | 0.393/0.607 |
| Na(4)/Cd(4) | 1879(1) | 2187(1) | 3573(4)   | 7(1)            | 0.375/0.625 |
| Cd(5)       | 1798(1) | 918(1)  | 954(3)    | 17(1)           | 1           |
| Cd(6)       | 1202(1) | 1004(1) | -2734(3)  | 14(1)           | 1           |
| Cd(7)       | 709(1)  | 590(1)  | 1654(3)   | 12(1)           | 1           |
| Cd(8)       | 1081(1) | 171(1)  | 6554(3)   | 16(1)           | 1           |
| Cd(9)       | 924(1)  | 1493(1) | -7660(3)  | 12(1)           | 1           |
| Cd(10)      | 124(1)  | 934(1)  | 944(3)    | 12(1)           | 1           |
| Cd(11)      | 323(1)  | 1433(1) | -3712(3)  | 20(1)           | 1           |
| Cd(12)      | 2349(1) | 630(1)  | 5194(3)   | 12(1)           | 1           |
| Na(5)       | 0       | 0       | 3300(80)  | 123(7)          | 1           |
| Na(6)       | 3326(3) | 68(3)   | 4540(70)  | 142(6)          | 1           |
| B(1)        | 495(3)  | 151(2)  | 6880(50)  | 13(3)           | 1           |
| B(2)        | 1283(3) | 2215(2) | 4690(50)  | 10(3)           | 1           |
| B(3)        | 1341(3) | 553(2)  | 2610(40)  | 10(3)           | 1           |
| B(4)        | 2984(3) | 635(2)  | 13770(50) | 12(3)           | 1           |
| B(5)        | 1777(3) | 457(2)  | 5890(50)  | 11(3)           | 1           |
| B(6)        | 1509(3) | 1328(2) | -6060(50) | 11(3)           | 1           |
| B(7)        | 3433(3) | 544(2)  | 10300(40) | 8(3)            | 1           |
| B(8)        | 2126(3) | 200(3)  | 9160(50)  | 14(3)           | 1           |
| B(9)        | 2218(3) | 1870(2) | -930(50)  | 9(3)            | 1           |
| B(10)       | 662(3)  | 1049(2) | -3530(50) | 10(3)           | 1           |
| B(11)       | 2335(3) | 1093(2) | 1940(50)  | 9(3)            | 1           |
| B(12)       | 148(3)  | 431(2)  | -1380(50) | 12(3)           | 1           |
| O(1)        | 2311(2) | 360(2)  | 9840(30)  | 10(2)           | 1           |

---

|       |         |         |            |       |   |
|-------|---------|---------|------------|-------|---|
| O(2)  | 806(2)  | 849(2)  | -3480(30)  | 16(2) | 1 |
| O(3)  | 2774(2) | 520(2)  | 14730(30)  | 15(2) | 1 |
| O(4)  | 786(2)  | 1251(2) | -2730(30)  | 15(2) | 1 |
| O(5)  | 1897(2) | 660(2)  | 5760(30)   | 14(2) | 1 |
| O(6)  | 1471(2) | 2055(2) | 3990(30)   | 17(2) | 1 |
| O(7)  | 685(2)  | 319(2)  | 6720(30)   | 14(2) | 1 |
| O(8)  | 1120(2) | 443(2)  | 1620(30)   | 12(2) | 1 |
| O(9)  | 1963(2) | 1918(2) | -1440(30)  | 18(2) | 1 |
| O(10) | 1267(2) | 1280(2) | -7580(30)  | 16(2) | 1 |
| O(11) | 1193(2) | -57(2)  | 11450(30)  | 17(2) | 1 |
| O(12) | 1384(2) | 775(1)  | 1750(30)   | 11(2) | 1 |
| O(13) | 2378(2) | 877(2)  | 330(30)    | 27(3) | 1 |
| O(14) | 1628(2) | 1538(2) | 3520(30)   | 18(2) | 1 |
| O(15) | 2851(2) | 24(2)   | 4970(30)   | 20(2) | 1 |
| O(16) | 2103(2) | 1194(2) | 1740(30)   | 20(2) | 1 |
| O(17) | 1888(2) | 263(2)  | 7360(30)   | 16(2) | 1 |
| O(18) | 3182(2) | 503(2)  | 11790(40)  | 19(2) | 1 |
| O(19) | 401(2)  | 1046(2) | -4190(30)  | 15(2) | 1 |
| O(20) | 525(2)  | 1637(2) | -8290(30)  | 17(2) | 1 |
| O(21) | 278(2)  | 587(2)  | 590(30)    | 19(2) | 1 |
| O(22) | 1634(2) | 1160(2) | -4000(30)  | 14(2) | 1 |
| O(23) | 1953(2) | 2429(2) | -1410(30)  | 21(2) | 1 |
| O(24) | 1044(2) | 2157(2) | 6480(30)   | 17(2) | 1 |
| O(25) | 2321(2) | 1660(2) | -1570(30)  | 15(2) | 1 |
| O(26) | 2375(2) | 2056(2) | 300(40)    | 27(3) | 1 |
| O(27) | 1050(2) | 1753(2) | -12310(30) | 13(2) | 1 |
| O(28) | 1527(2) | 419(2)  | 4470(30)   | 18(2) | 1 |
| O(29) | 239(2)  | 210(2)  | 7790(30)   | 16(2) | 1 |
| O(30) | 45(2)   | 1301(2) | 1190(30)   | 15(2) | 1 |

---



**Table S2.** Selected bond distances (Å) and angles (deg) for Na<sub>2</sub>Cd<sub>7</sub>B<sub>8</sub>O<sub>20</sub>.

|               |           |               |           |
|---------------|-----------|---------------|-----------|
| Cd(1)-O(25)   | 2.217(9)  | Cd(12)-O(5)   | 2.344(9)  |
| Cd(1)-O(16)   | 2.259(11) | Cd(12)-O(1)#1 | 2.413(10) |
| Cd(1)-O(14)#1 | 2.269(9)  | Na(1)-O(25)   | 2.217(9)  |
| Cd(1)-O(16)#1 | 2.275(11) | Na(1)-O(16)   | 2.259(11) |
| Cd(1)-O(22)   | 2.469(9)  | Na(1)-O(14)#1 | 2.269(9)  |
| Cd(2)-O(14)   | 2.258(10) | Na(1)-O(16)#1 | 2.275(11) |
| Cd(2)-O(6)#1  | 2.263(10) | Na(1)-O(22)   | 2.469(9)  |
| Cd(2)-O(6)    | 2.368(11) | Na(2)-O(14)   | 2.258(10) |
| Cd(2)-O(14)#1 | 2.386(11) | Na(2)-O(6)#1  | 2.263(10) |
| Cd(2)-O(27)#2 | 2.403(9)  | Na(2)-O(6)    | 2.368(11) |
| Cd(2)-O(9)    | 2.463(9)  | Na(2)-O(14)#1 | 2.386(11) |
| Cd(3)-O(15)   | 2.193(10) | Na(2)-O(27)#2 | 2.403(9)  |
| Cd(3)-O(15)#2 | 2.250(10) | Na(2)-O(9)    | 2.463(9)  |
| Cd(3)-O(1)    | 2.276(8)  | Na(3)-O(15)   | 2.193(10) |
| Cd(3)-O(3)    | 2.307(10) | Na(3)-O(15)#2 | 2.250(10) |
| Cd(3)-O(3)#1  | 2.370(10) | Na(3)-O(1)    | 2.276(8)  |
| Cd(3)-O(18)   | 2.836(10) | Na(3)-O(3)    | 2.307(10) |
| Cd(4)-O(23)   | 2.233(11) | Na(3)-O(3)#1  | 2.370(10) |
| Cd(4)-O(23)#2 | 2.243(10) | Na(3)-O(18)   | 2.836(10) |
| Cd(4)-O(6)    | 2.248(9)  | Na(4)-O(23)   | 2.233(11) |
| Cd(4)-O(9)#2  | 2.351(10) | Na(4)-O(23)#2 | 2.243(10) |
| Cd(4)-O(9)    | 2.358(11) | Na(4)-O(6)    | 2.248(9)  |
| Cd(5)-O(16)   | 2.273(9)  | Na(4)-O(9)#2  | 2.351(10) |
| Cd(5)-O(5)    | 2.280(10) | Na(4)-O(9)    | 2.358(11) |
| Cd(5)-O(12)   | 2.310(9)  | Na(5)-O(29)   | 2.31(2)   |
| Cd(5)-O(22)   | 2.350(9)  | Na(5)-O(29)#5 | 2.31(2)   |
| Cd(5)-O(5)#1  | 2.374(10) | Na(5)-O(29)#6 | 2.55(2)   |
| Cd(5)-O(22)#2 | 2.375(10) | Na(5)-O(29)#1 | 2.55(2)   |
| Cd(6)-O(12)   | 2.234(9)  | Na(6)-O(17)#9 | 2.35(2)   |
| Cd(6)-O(2)    | 2.251(9)  | Na(6)-O(15)   | 2.46(2)   |

|                 |           |                |           |
|-----------------|-----------|----------------|-----------|
| Cd(6)-O(10)     | 2.329(11) | Na(6)-O(24)#10 | 2.48(2)   |
| Cd(6)-O(10)#2   | 2.401(10) | Na(6)-O(11)#9  | 2.56(2)   |
| Cd(6)-O(22)     | 2.444(9)  | Na(6)-O(24)#11 | 2.72(2)   |
| Cd(6)-O(12)#1   | 2.482(9)  | Na(6)-O(18)#1  | 2.82(2)   |
| Cd(6)-O(4)      | 2.587(10) | B(1)-O(23)#8   | 1.357(17) |
| Cd(7)-O(21)     | 2.254(10) | B(1)-O(7)      | 1.392(17) |
| Cd(7)-O(8)      | 2.286(9)  | B(1)-O(29)     | 1.398(16) |
| Cd(7)-O(2)#2    | 2.293(10) | B(2)-O(11)#4   | 1.367(17) |
| Cd(7)-O(7)#1    | 2.310(10) | B(2)-O(6)      | 1.369(17) |
| Cd(7)-O(7)      | 2.342(10) | B(2)-O(24)     | 1.413(17) |
| Cd(7)-O(2)      | 2.360(10) | B(3)-O(12)     | 1.353(16) |
| Cd(8)-O(11)     | 2.205(10) | B(3)-O(8)      | 1.354(16) |
| Cd(8)-O(7)      | 2.219(8)  | B(3)-O(28)     | 1.390(17) |
| Cd(8)-O(11)#1   | 2.260(10) | B(4)-O(3)      | 1.318(17) |
| Cd(8)-O(8)      | 2.317(10) | B(4)-O(20)#13  | 1.362(17) |
| Cd(8)-O(8)#2    | 2.349(10) | B(4)-O(18)     | 1.445(17) |
| Cd(8)-O(28)     | 2.812(5)  | B(5)-O(5)      | 1.345(17) |
| Cd(9)-O(10)     | 2.167(9)  | B(5)-O(17)     | 1.365(16) |
| Cd(9)-O(20)     | 2.235(9)  | B(5)-O(28)     | 1.393(17) |
| Cd(9)-O(27)     | 2.288(9)  | B(6)-O(22)     | 1.372(17) |
| Cd(9)-O(4)      | 2.302(9)  | B(6)-O(10)     | 1.377(17) |
| Cd(9)-O(4)#1    | 2.335(10) | B(6)-O(14)#1   | 1.383(17) |
| Cd(9)-O(27)#2   | 2.454(9)  | B(7)-O(27)#13  | 1.339(16) |
| Cd(10)-O(21)    | 2.183(10) | B(7)-O(24)#10  | 1.384(16) |
| Cd(10)-O(30)    | 2.195(9)  | B(7)-O(18)     | 1.405(16) |
| Cd(10)-O(19)#2  | 2.275(9)  | B(8)-O(15)#3   | 1.346(17) |
| Cd(10)-O(19)    | 2.342(10) | B(8)-O(1)      | 1.357(17) |
| Cd(10)-O(25)#7  | 2.365(10) | B(8)-O(17)     | 1.422(17) |
| Cd(10)-O(25)#12 | 2.371(10) | B(9)-O(9)      | 1.352(16) |
| Cd(11)-O(20)    | 2.218(10) | B(9)-O(25)     | 1.362(16) |
| Cd(11)-O(19)    | 2.313(9)  | B(9)-O(26)     | 1.418(16) |
| Cd(11)-O(30)    | 2.325(10) | B(10)-O(19)    | 1.365(17) |

|                     |           |                        |           |
|---------------------|-----------|------------------------|-----------|
| Cd(11)-O(30)#1      | 2.371(10) | B(10)-O(4)             | 1.372(16) |
| Cd(11)-O(20)#2      | 2.423(11) | B(10)-O(2)             | 1.391(16) |
| Cd(11)-O(13)#12     | 2.606(12) | B(11)-O(16)            | 1.336(16) |
| Cd(11)-O(4)         | 2.638(10) | B(11)-O(30)#10         | 1.386(16) |
| Cd(12)-O(13)        | 2.196(11) | B(11)-O(13)            | 1.397(17) |
| Cd(12)-O(1)         | 2.242(9)  | B(12)-O(21)            | 1.320(18) |
| Cd(12)-O(13)#2      | 2.268(11) | B(12)-O(29)#1          | 1.408(16) |
| Cd(12)-O(3)#1       | 2.291(9)  | B(12)-O(26)#12         | 1.437(17) |
|                     |           |                        |           |
| O(23)#8-B(1)-O(7)   | 122.1(12) | O(27)#13-B(7)-O(24)#10 | 124.1(12) |
| O(23)#8-B(1)-O(29)  | 118.0(12) | O(27)#13-B(7)-O(18)    | 125.3(12) |
| O(7)-B(1)-O(29)     | 119.9(12) | O(24)#10-B(7)-O(18)    | 110.7(11) |
| O(11)#4-B(2)-O(6)   | 124.9(12) | O(15)#3-B(8)-O(1)      | 125.4(13) |
| O(11)#4-B(2)-O(24)  | 113.2(11) | O(15)#3-B(8)-O(17)     | 114.5(12) |
| O(6)-B(2)-O(24)     | 121.7(11) | O(1)-B(8)-O(17)        | 120.1(12) |
| O(12)-B(3)-O(8)     | 123.1(12) | O(9)-B(9)-O(25)        | 123.1(12) |
| O(12)-B(3)-O(28)    | 121.8(12) | O(9)-B(9)-O(26)        | 115.7(11) |
| O(8)-B(3)-O(28)     | 115.0(11) | O(25)-B(9)-O(26)       | 121.2(11) |
| O(3)-B(4)-O(20)#13  | 127.0(13) | O(19)-B(10)-O(4)       | 120.3(12) |
| O(3)-B(4)-O(18)     | 115.0(12) | O(19)-B(10)-O(2)       | 121.1(11) |
| O(20)#13-B(4)-O(18) | 117.8(12) | O(4)-B(10)-O(2)        | 118.5(11) |
| O(5)-B(5)-O(17)     | 124.0(12) | O(16)-B(11)-O(30)#10   | 121.3(12) |
| O(5)-B(5)-O(28)     | 123.6(12) | O(16)-B(11)-O(13)      | 121.9(12) |
| O(17)-B(5)-O(28)    | 112.4(11) | O(30)#10-B(11)-O(13)   | 116.8(11) |
| O(22)-B(6)-O(10)    | 118.0(12) | O(21)-B(12)-O(29)#1    | 125.1(12) |
| O(22)-B(6)-O(14)#1  | 118.9(12) | O(21)-B(12)-O(26)#12   | 123.8(12) |
| O(10)-B(6)-O(14)#1  | 123.1(12) | O(29)#1-B(12)-O(26)#12 | 109.8(11) |

---

Symmetry transformations used to generate equivalent atoms:

#1 x,y,z-1 #2 x,y,z+1 #3 -x+1/2,-y,z+1/2

#4 -x+1/4,y+1/4,z-3/4 #5 -x,-y,z

#6 -x,-y,z-1 #7 x-1/4,-y+1/4,z+3/4

#8 -x+1/4,y-1/4,z+3/4 #9 -x+1/2,-y,z-1/2

#10  $x+1/4, -y+1/4, z+1/4$  #11  $x+1/4, -y+1/4, z-3/4$

#12  $x-1/4, -y+1/4, z-1/4$  #13  $x+1/4, -y+1/4, z+9/4$

**Table S3.** Calculation of local dipole moments for  $\text{Na}_2\text{Cd}_7\text{B}_8\text{O}_{20}$ ,  $\text{Cd}_2\text{B}_2\text{O}_5$  and  $\text{Cd}_4\text{BiO}(\text{BO}_3)_3$ .

| Compounds                                       |                          | Species                | Dipole moment      |       |       |       |      |
|-------------------------------------------------|--------------------------|------------------------|--------------------|-------|-------|-------|------|
|                                                 |                          |                        | x(a)               | y(b)  | z(c)  | debye |      |
| $\text{Na}_2\text{Cd}_7\text{B}_8\text{O}_{20}$ | $\text{BO}_3$            | B(10) $\text{O}_3$     | 0.26               | -0.04 | 0.68  | 0.73  |      |
|                                                 |                          | B(6) $\text{O}_3$      | 0.18               | -0.44 | 0.48  | 0.68  |      |
|                                                 |                          | B(11) $\text{O}_3$     | 0.91               | -0.23 | -0.16 | 0.95  |      |
|                                                 | $\text{B}_3\text{O}_7$   | B(9) $\text{O}_3$      | 0.04               | -1.10 | 0.19  | 1.11  |      |
|                                                 |                          | B(12) $\text{O}_3$     | -2.26              | -2.65 | 1.46  | 3.78  |      |
|                                                 |                          | B(1) $\text{O}_3$      | -0.64              | 0.07  | -0.19 | 0.67  |      |
|                                                 |                          | $\text{B}_3\text{O}_7$ | -2.86              | -3.68 | 1.46  | 4.88  |      |
|                                                 |                          | B(3) $\text{O}_3$      | 0.30               | -1.25 | -0.11 | 1.29  |      |
|                                                 |                          | B(5) $\text{O}_3$      | -0.87              | -1.59 | -0.22 | 1.82  |      |
|                                                 |                          | B(8) $\text{O}_3$      | -1.37              | -0.28 | -0.94 | 1.68  |      |
|                                                 |                          | $\text{B}_3\text{O}_7$ | -1.93              | -3.12 | -1.27 | 3.88  |      |
|                                                 |                          | B(4) $\text{O}_3$      | 0.97               | -1.06 | -1.82 | 2.32  |      |
|                                                 |                          | B(7) $\text{O}_3$      | -0.88              | -2.04 | 0.11  | 2.22  |      |
|                                                 |                          | B(2) $\text{O}_3$      | -1.12              | -0.73 | 1.16  | 1.77  |      |
|                                                 |                          | $\text{B}_3\text{O}_7$ | -1.02              | -3.83 | -0.54 | 4.00  |      |
|                                                 |                          | $\text{NaO}_4$         | Na(5) $\text{O}_4$ | 0     | 0     | 8.57  | 8.57 |
|                                                 |                          | $\text{NaO}_6$         | Na(6) $\text{O}_6$ | 0.17  | 6.26  | 2.28  | 6.66 |
| $\text{Na/CdO}_6$                               | Na(2)/Cd(3) $\text{O}_6$ | 2.28                   | -2.37              | -1.28 | 3.52  |       |      |
|                                                 | Na(3)/Cd(3) $\text{O}_6$ | 3.58                   | 5.23               | 1.38  | 6.48  |       |      |
| $\text{Na/CdO}_5$                               | Na(1)/Cd(1) $\text{O}_5$ | -1.39                  | 6.46               | 2.17  | 6.95  |       |      |
|                                                 | Na(4)/Cd(4) $\text{O}_5$ | -1.95                  | 2.77               | 0.46  | 3.42  |       |      |
| $\text{CdO}_6$                                  | Cd(5) $\text{O}_6$       | 2.85                   | 1.95               | 1.65  | 3.83  |       |      |

|                                                    |                  |                      |       |       |       |      |
|----------------------------------------------------|------------------|----------------------|-------|-------|-------|------|
|                                                    |                  | Cd(7)O <sub>6</sub>  | -1.42 | -3.26 | -1.02 | 3.69 |
|                                                    |                  | Cd(8)O <sub>6</sub>  | -2.15 | 6.07  | -0.90 | 6.50 |
|                                                    |                  | Cd(9)O <sub>6</sub>  | 0.78  | -1.36 | -0.78 | 1.75 |
|                                                    |                  | Cd(10)O <sub>6</sub> | -1.21 | 0.98  | 0.05  | 1.56 |
|                                                    |                  | Cd(12)O <sub>6</sub> | 0.08  | 0.17  | 0.18  | 0.26 |
|                                                    | CdO <sub>7</sub> | Cd(6)O <sub>7</sub>  | -1.41 | 4.85  | -1.38 | 5.23 |
|                                                    |                  | Cd(11)O <sub>7</sub> | 0.57  | -3.45 | 0.77  | 3.59 |
| Cd <sub>2</sub> B <sub>2</sub> O <sub>5</sub>      | CdO <sub>6</sub> | Cd(1)O <sub>6</sub>  | -4.74 | -2.33 | -0.14 | 4.69 |
|                                                    |                  | Cd(2)O <sub>6</sub>  | 3.12  | 5.18  | 2.47  | 5.76 |
|                                                    |                  | Cd(3)O <sub>6</sub>  | -4.08 | -4.54 | -2.22 | 5.59 |
|                                                    |                  | Cd(4)O <sub>6</sub>  | 4.59  | 1.72  | 0.11  | 4.45 |
| Cd <sub>4</sub> BiO(BO <sub>3</sub> ) <sub>3</sub> | CdO <sub>6</sub> | Cd(1)O <sub>6</sub>  | 1.18  | -1.67 | -0.30 | 2.10 |
|                                                    | CdO <sub>7</sub> | Cd(2)O <sub>7</sub>  | -3.19 | 2.84  | -1.95 | 4.45 |
